# Supplementary material
Source: PubMed Central journal article supplement (PMC6200927)

A

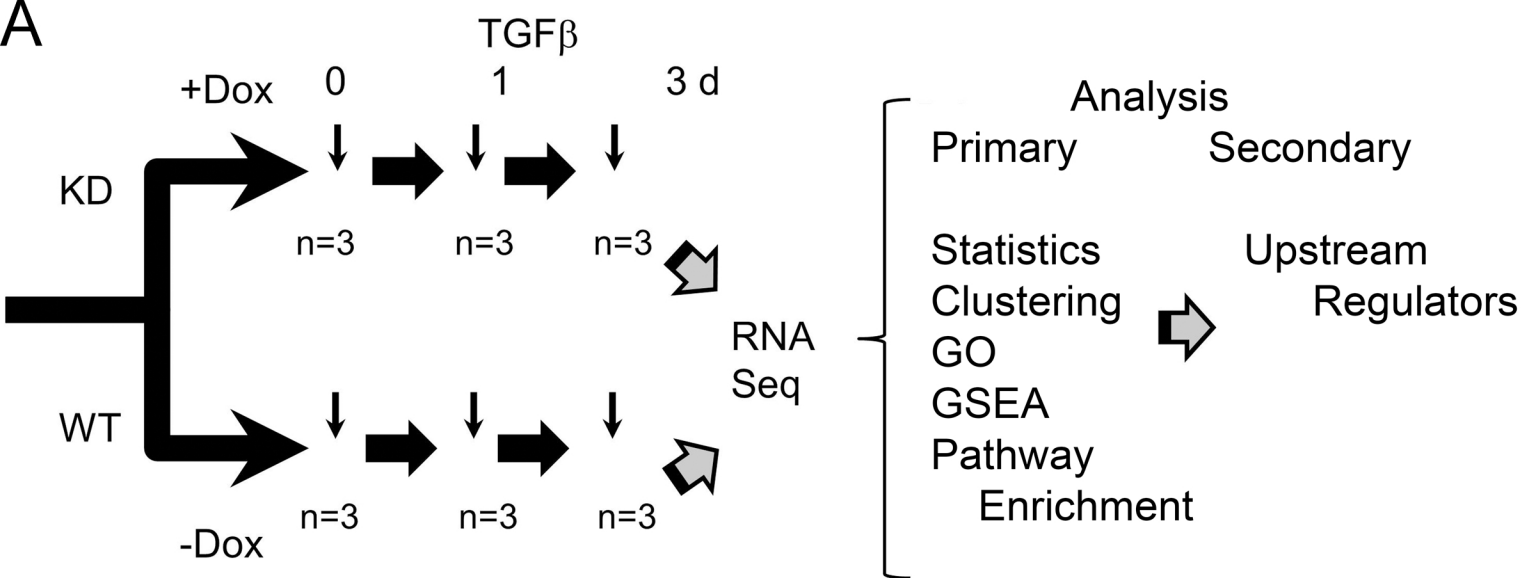

B

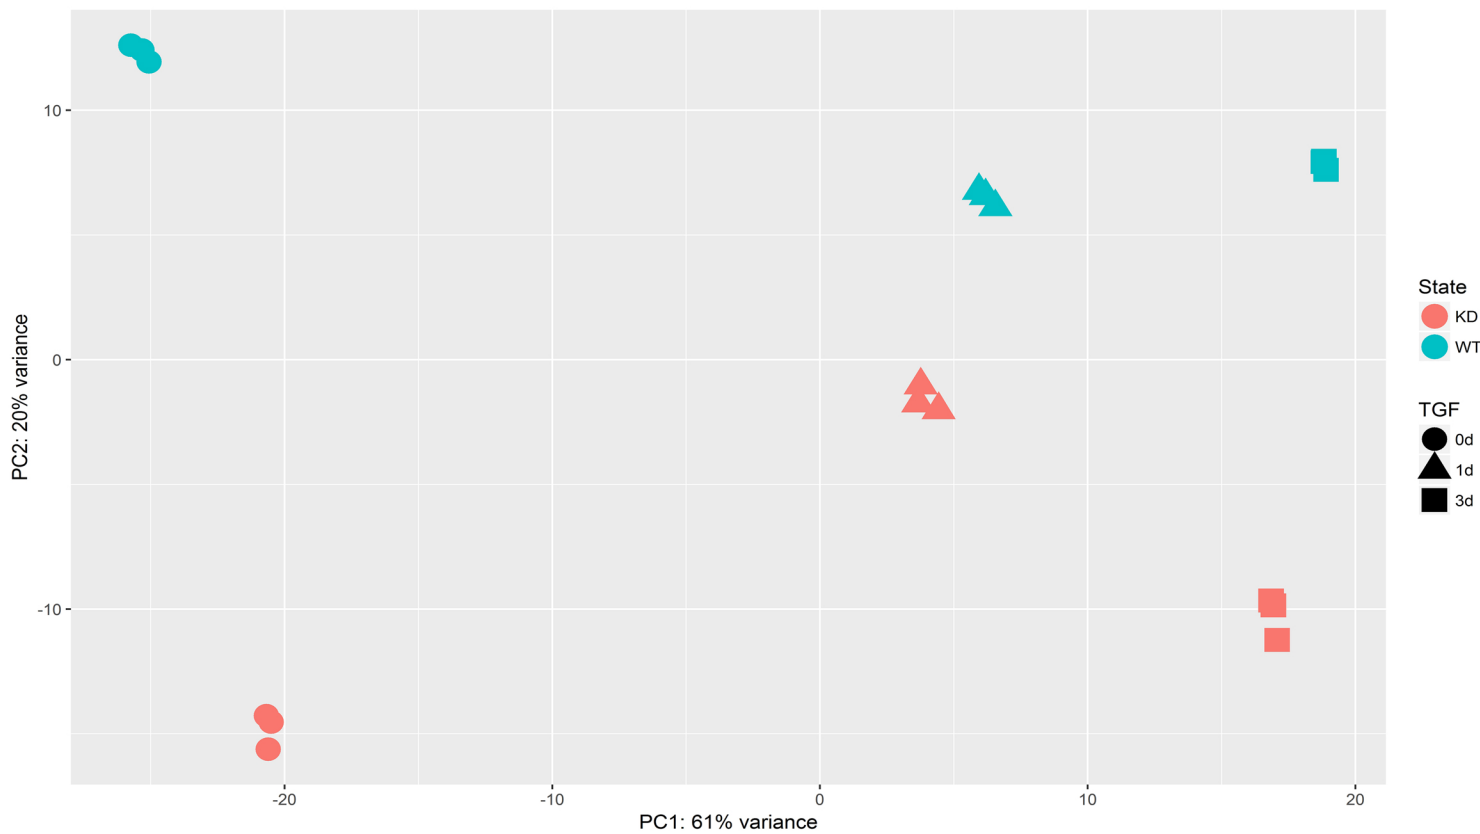

Supplement: supp_RA118.003662_137719_2_supp_171652_pc4wx0.pdf [file supp_RA118.003662_137719_2_supp_171652_pc4wx0.pdf]
